# Supplementary material for: Emerging halogenated flame retardants and hexabromocyclododecanes in food samples from an e-waste processing area in Vietnam
Source: Royal Society of Chemistry journal article supplement (doi:10.1039/c5em00593k), 2016-01-01
Supplement: c5em00593k1.pdf [file c5em00593k1.pdf]

SUPPORTING INFORMATION FOR:

**EMERGING HALOGENATED FLAME RETARDANTS AND  
HEXABROMOCYCLODODECANES IN FOOD SAMPLES FROM AN  
E-WASTE PROCESSING AREA IN VIETNAM**

Fang Tao, Hidenori Matsukami, Go Suzuki, Nguyen Minh Tue, Pham Hung Viet, Hidetaka Takigami, Stuart Harrad

2 tables, 2 figures, 4 pages

Tables:

Page S2, Table S1. CAS number and full name of emerging HFRs

Page S2, Table S2. Data used in this study on daily consumption rates for foodstuffs

Figures:

Page S3, Fig. S1. Contributions to dietary exposure in different food types from different Emerging HFRs in Bui Dau, Vietnam

Page S3, Fig. S2. Contributions to dietary exposure in different food types from HBCD isomers in Bui Dau, Vietnam

**Table S1 CAS number and full name of emerging HFRs**

| Full name                               | Abbreviation     | CAS number, Molecular formula                                               |
|-----------------------------------------|------------------|-----------------------------------------------------------------------------|
| 1,2,3,4,5-Pentabromobenzene             | PBB <sub>Z</sub> | 608-90-2, C <sub>6</sub> HBr <sub>5</sub>                                   |
| Hexabromobenzene                        | HBB              | 87-83-2, C <sub>6</sub> Br <sub>6</sub>                                     |
| 1,2-Bis(2,4,6-tribromophenoxy)ethane    | BTBPE            | 37853-59-1, C <sub>14</sub> H <sub>8</sub> Br <sub>6</sub> O <sub>2</sub>   |
| Bis(2-ethylhexyl)tetrabromophthalate    | BEH-TEBP(TBPH)   | 26040-51-7, C <sub>24</sub> H <sub>34</sub> Br <sub>4</sub> O <sub>4</sub>  |
| Dechlorane Plus (syn isomer)            | <i>syn</i> -DP   | 135821-03-9, C <sub>18</sub> H <sub>12</sub> Cl <sub>12</sub>               |
| Dechlorane Plus (anti isomer)           | <i>anti</i> -DP  | 135821-74-8, C <sub>18</sub> H <sub>12</sub> Cl <sub>12</sub>               |
| Decabromodiphenylethane                 | DBDPE            | 84852-53-9, C <sub>14</sub> H <sub>4</sub> Br <sub>10</sub>                 |
| 2-Ethylhexyl 2,3,4,5-tetrabromobenzoate | EH-TBB(TBB)      | 183658-27-7, C <sub>15</sub> H <sub>19</sub> Br <sub>4</sub> O <sub>2</sub> |

**Table S2 Data used in this study on daily consumption rates for foodstuffs <sup>1</sup>**

| Food type                 | Daily consumption rate, g/day |                   |
|---------------------------|-------------------------------|-------------------|
|                           | adult                         | child             |
| <b>Fish</b>               |                               |                   |
| freshwater fish           | 25                            | 20                |
| <b>Poultry &amp; meat</b> |                               |                   |
| pork                      | 30                            | 10 <sup>b</sup>   |
| chicken                   | 16                            | 10 <sup>b</sup>   |
| duck                      | 12                            | 10 <sup>b</sup>   |
| <b>Liver</b>              |                               |                   |
| chicken liver             | 5.5 <sup>a</sup>              | 5 <sup>b</sup>    |
| <b>Egg</b>                |                               |                   |
| chicken egg               | 30                            | 30                |
| duck egg                  | 30                            | 30                |
| <b>Chicken skin</b>       | 0.72 <sup>c</sup>             | 0.45 <sup>d</sup> |

a- derived from assumption that liver intake (11 g/day<sup>2</sup>) is split equally between chicken and duck liver.

b - derived from assumption that poultry & meat intake for children (40 g/day<sup>3</sup>) is split equally between chicken meat, pork, duck meat and liver, and that liver intake is further split equally between chicken and duck liver.

c - derived from 4.5% (nearly the weight percent of the chicken skin of the whole chicken) of assumption that chicken meat intake.

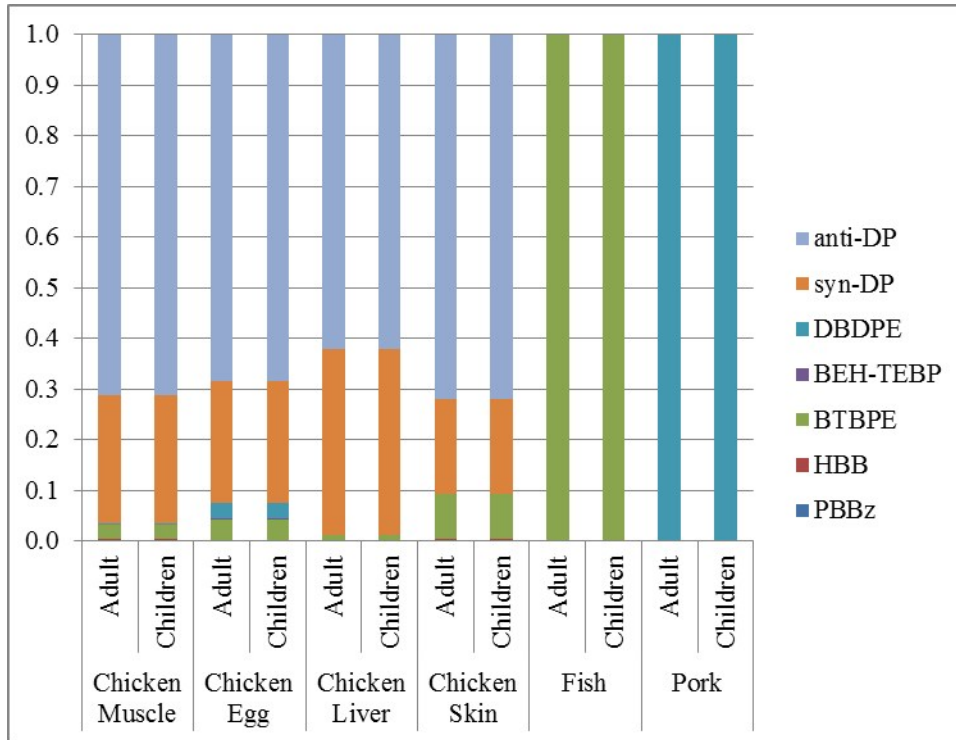

**Fig. S1 Contributions to dietary exposure in different food types from different Emerging HFRs in Bui Dau, Vietnam.**

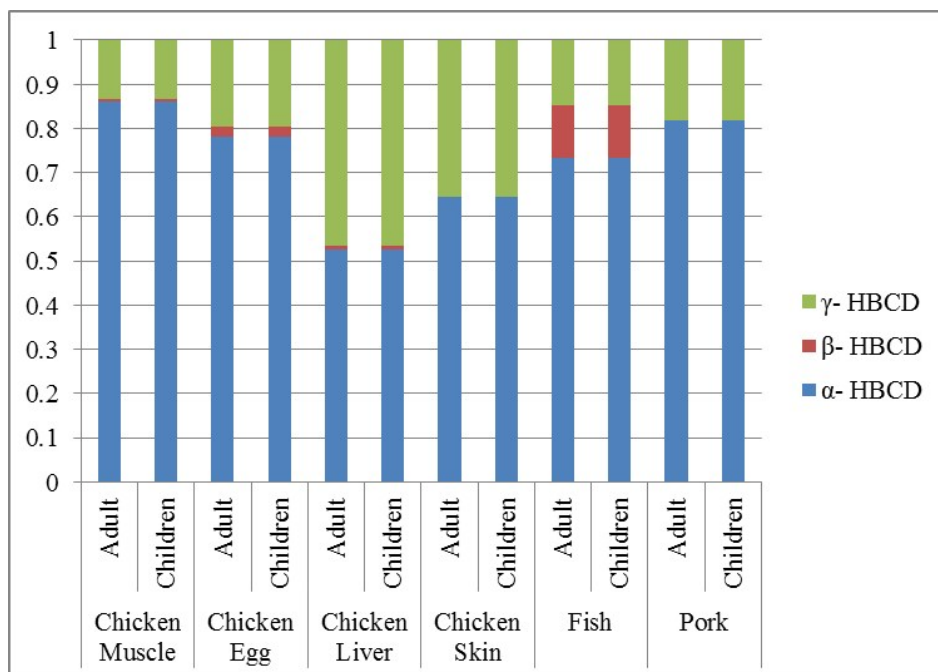

**Fig. S2 Contributions to dietary exposure in different food types from HBCD isomers in Bui Dau, Vietnam.**

- 1 I. Labunska, M. A.-E. Abdallah, I. Eulaers, A. Covaci, F. Tao, M. Wang, D. Santillo, P. Johnston and S. Harrad, *Environ. Int.*, 2015, **74**, 209–220.
- 2 G. H. Xing, S. C. Wu and M. H. Wong, *Chemosphere*, 2010, **81**, 1239–44.
- 3 Chinese nutrition society. Dietary Guidelines for pregnant women, lactating women and children aged 0-6 in China. 2007, People's Medical Publishing House Co. Ltd.
